# Supplementary material for: High Fat-to-Muscle Ratio Was Associated with Increased Clinical Severity in Patients with Abdominal Trauma
Source: MDPI journal article supplement (doi:10.3390/jcm12041503), 2023-02-14
Supplement: s1 [file s1]

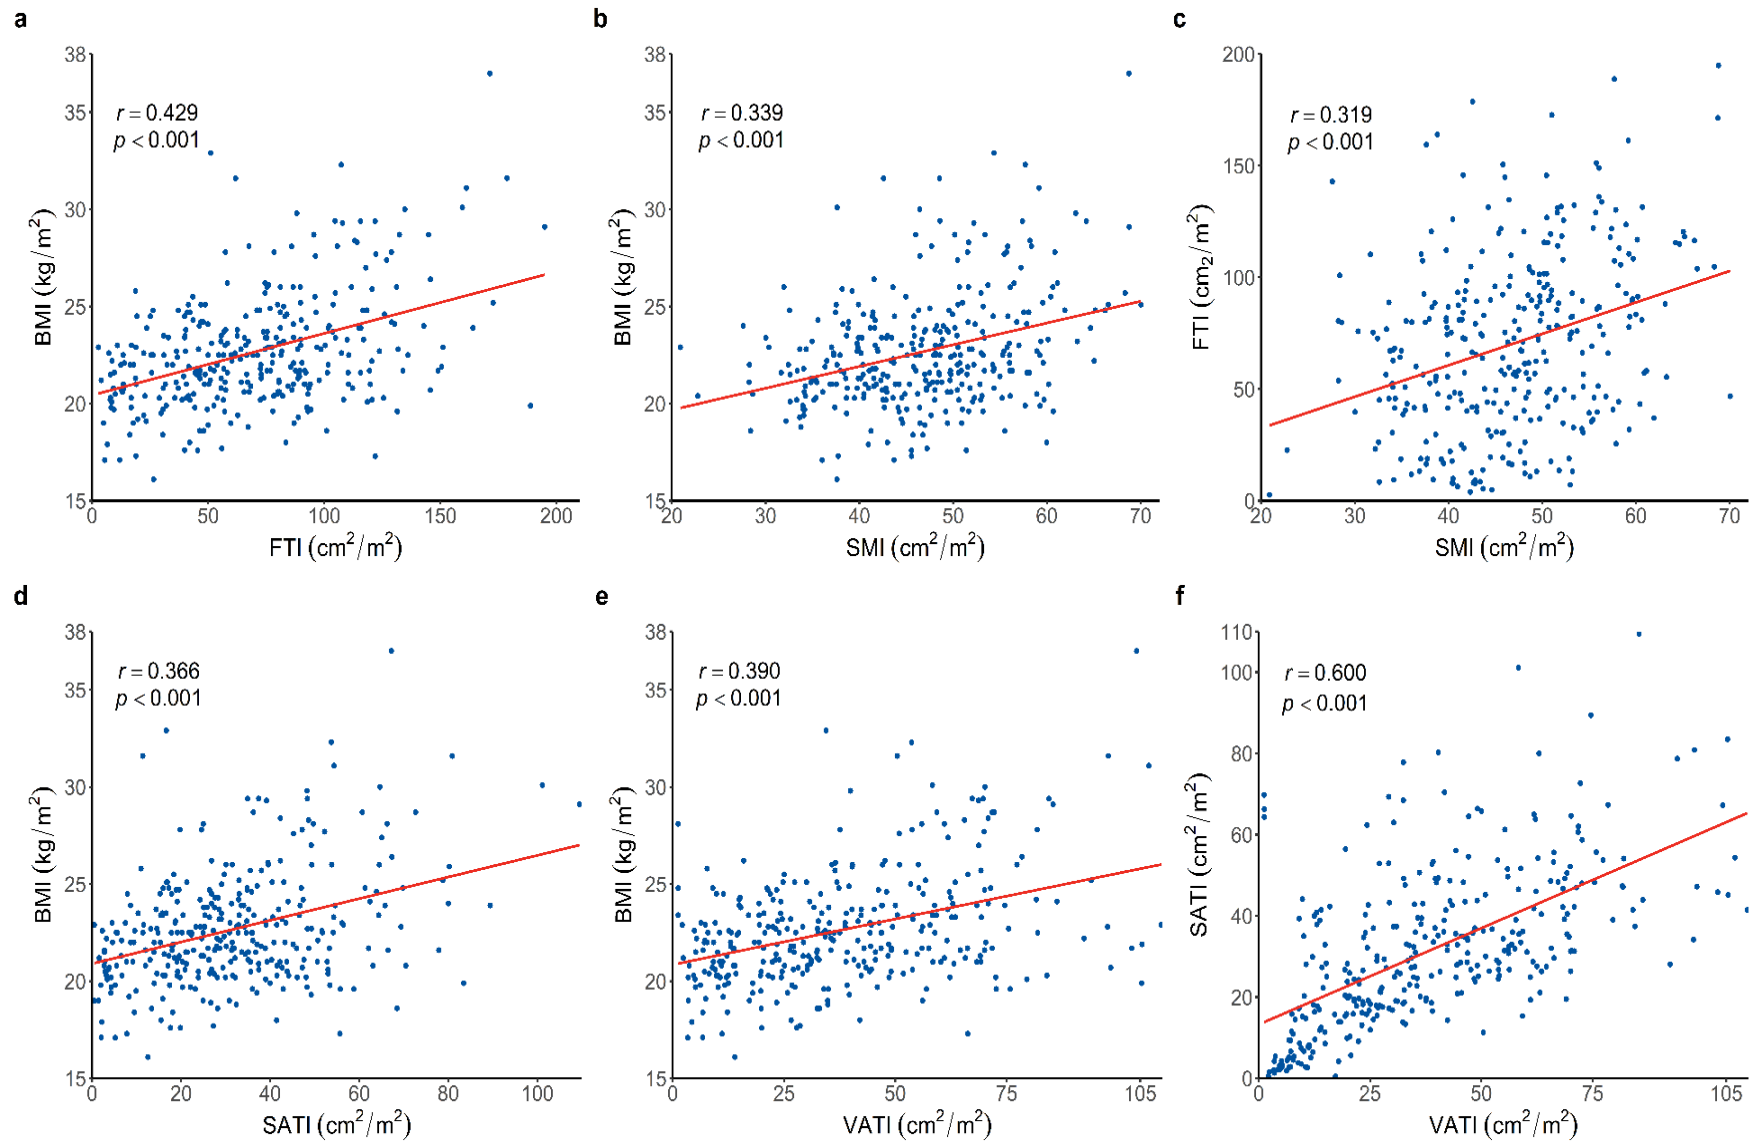

**Figure S1** Scatter plots of different body composition indexes in patients with abdominal trauma. (a): BMI and FTI; (b): BMI and SMI; (c): FTI and SMI; (d): BMI and SATI; (e): BMI and VATI; (f) SATI and VATI. Pearson correlation coefficients and *P* values were provided. BMI, body mass index; FTI, fat tissue index; SMI, skeletal muscle index; SATI, subcutaneous adipose tissue index; VATI, visceral adipose tissue index.

**Table S1** Association between abdominal fat distribution and 28-day mortality, mechanical ventilation and ICU length of stay  $\geq 5$  d in patients with abdominal trauma

| Outcomes                                        | Unadjusted       |                | Model 1          |                | Model 2          |                |
|-------------------------------------------------|------------------|----------------|------------------|----------------|------------------|----------------|
|                                                 | OR (95% CI)      | <i>P</i> value | OR (95% CI)      | <i>P</i> value | OR (95% CI)      | <i>P</i> value |
| <b>Mortality</b>                                |                  |                |                  |                |                  |                |
| VATI/SATI <sup>a</sup> (H vs. L)                | 1.68 (0.69-4.35) | 0.264          | 1.40 (0.56-3.73) | 0.477          | 1.44 (0.55-3.99) | 0.462          |
| <b>Mechanical ventilation</b>                   |                  |                |                  |                |                  |                |
| VATI/SATI <sup>a</sup> (H vs. L)                | 1.37 (0.86-2.20) | 0.189          | 1.20 (0.74-1.96) | 0.464          | 0.99 (0.53-1.83) | 0.962          |
| <b>ICU length of stay <math>\geq 5</math> d</b> |                  |                |                  |                |                  |                |
| VATI/SATI <sup>a</sup> (H vs. L)                | 1.22 (0.79-1.88) | 0.377          | 1.18 (0.75-1.86) | 0.466          | 1.14 (0.69-1.90) | 0.602          |

Model 1: Adjusted for sex and age. Model 2: Adjusted for sex, age, injury severity score  $\geq 16$ , hypertension, diabetes, smoking history, alcohol consumption, heart rate  $>120$  beats/min, respiratory rate  $>20$  beats/min, systolic blood pressure  $< 90$  mmHg, Glasgow Coma Scale score  $< 9$  and laparotomy. <sup>a</sup> Sex-specific medians were used as the cutoff values for VATI/SATI (0.75 in men, 0.85 in women). VATI, visceral adipose tissue index; SATI, subcutaneous adipose tissue index; ICU, intensive care unit.
